# Supplementary material
Source: PubMed Central journal article supplement (PMC4718443)

## Supplementary Online Content

**eTable 1.** Literature search strategy (PubMed)

**eTable 2.** Characteristics of the 11 studies included in the meta-analysis of the effect of metformin on breast cancer mortality (supplementary)

**eTable 3.** Study quality assessment

**eFigure 1.**

Egger's plot of 14 estimates included in the meta-analysis of the effect of metformin on long-term, all-cause mortality of breast cancer ( $P < 0.001$ ).

**eFigure 2.**

Begg's funnel plot of 14 estimates included in the meta-analysis of the effect of metformin on long-term, all-cause mortality of breast cancer (continuity corrected,  $P = 0.827$ ).

**eFigure 3.**

Funnel plot after trim and fill method. Abbreviation: s.e., standard error. Each hollow circle represents an individual study for the indicated association in original observation studies.

**eFigure 4.**

Meta-analysis and pooled hazard ratio of breast cancer specific mortality in three studies comparing breast cancer patients with and without metformin. Abbreviations: CI, confidence interval; HR, hazard ratio. Weights are from random-effects analysis. Data markers are proportional to study sample sizes. Squares indicate relative risk in each study. The square size is proportional to the weight of the corresponding study in the meta-analysis; the length of the horizontal lines represents the 95% CI. The unshaded diamond indicates the pooled relative risk and 95% CI.

**eFigure 5.**

Meta-analysis and pooled hazard ratio of long-term, all-cause mortality in three studies (six estimates) comparing diabetic breast cancer patients with metformin and non-diabetic counterparts. Abbreviations: CI, confidence interval; HR, hazard ratio. Xiao (1)-(3) indicate Luminal A, Luminal B (high Ki-67), and Luminal B (her-2/neu+) subgroups, respectively. Xu (1)-(2) indicate Vanderbilt and Mayo Clinic subgroups, respectively. Weights are from random-effects analysis. Data markers are proportional to study sample sizes. Squares indicate relative risk in each study. The square size is proportional to the weight of the corresponding study in the meta-analysis; the length of the horizontal lines represents the 95% CI. The unshaded diamond indicates the pooled relative risk and 95% CI.

**eTable 1.** Literature search strategy (PubMed)

| Database      | Year included                 | Search terms                                                                                                                                                                                                          |
|---------------|-------------------------------|-----------------------------------------------------------------------------------------------------------------------------------------------------------------------------------------------------------------------|
| <b>PubMed</b> | Inception to January 10, 2015 | breast AND cancer [sb] AND (metformin) AND<br>(incidence[MeSH:noexp] OR mortality[MeSH Terms] OR follow<br>up studies[MeSH:noexp] OR survival OR prognos*[Text Word]<br>OR predict*[Text Word] OR course*[Text Word]) |

**eTable 2.** Characteristics of the 11 studies included in the meta-analysis of the effect of metformin on breast cancer mortality (supplementary)

| Study, year, country       | Date of recruitment (range) | Study source                                                          | Exclusion criteria                                                                                                                                                                                                                                                                                                           | Patients with DM No./Total no. (%) | Dose of metformin | Adjustments                                                                                                                                                                                                                                                                                                                                                                                                   |
|----------------------------|-----------------------------|-----------------------------------------------------------------------|------------------------------------------------------------------------------------------------------------------------------------------------------------------------------------------------------------------------------------------------------------------------------------------------------------------------------|------------------------------------|-------------------|---------------------------------------------------------------------------------------------------------------------------------------------------------------------------------------------------------------------------------------------------------------------------------------------------------------------------------------------------------------------------------------------------------------|
| Bayraktar, 2012, USA[21]   | 1995-2007                   | MD Anderson                                                           | Metastatic or bilateral disease, a prior history of cancer, resolved gestational diabetes, or diabetes diagnosed after the period of adjuvant chemotherapy                                                                                                                                                                   | 130/1448(9.0%)                     | NA                | Age, body weight, tumor size, lymph node status, nuclear grade, LVI, and type of adjuvant chemotherapy received                                                                                                                                                                                                                                                                                               |
| He, 2012, USA[22]          | 1998.1.1-2010.9.30          | MD Anderson                                                           | Ductal carcinoma in situ or stage 1 disease, male, unknown ER or PR status, resolved gestational diabetes, type 1 diabetes, diabetic patients on dietary management only and not on any form of anti-diabetic pharmacotherapy before and after diagnosis of breast cancer, incomplete records (including medication records) | 154/1983 (7.8%)                    | NA                | Age, BMI, stage, ER/PR, insulin, insulin secretagogues, thiazolidinedione                                                                                                                                                                                                                                                                                                                                     |
| Zhao, 2012, China[26]      | 2000.1-2005.12              | The Second Affiliated Hospital Zhejiang University School of Medicine |                                                                                                                                                                                                                                                                                                                              |                                    | NA                | Age, menopausal status, cancer stages                                                                                                                                                                                                                                                                                                                                                                         |
| Cleveland, 2012, USA[27]   | 1996.8.1-1997.7.31          | Long Island Breast Cancer Study Project (LIBCSP)                      |                                                                                                                                                                                                                                                                                                                              |                                    | NA                | Menopausal status, obesity (BMI <30, BMI ≥30), race (white, other), and history of BMI                                                                                                                                                                                                                                                                                                                        |
| Lega, 2013, Canada[23]     | 1997.4.1-2008.3.31          | Ontario health care databases                                         |                                                                                                                                                                                                                                                                                                                              |                                    | NA                | Sulfonylurea, insulin, TZD use, age at breast cancer diagnosis, duration of diabetes (years) before breast cancer, comorbidity score based on adjusted ACG score at time of cohort entry, breast cancer treatments received within 1 year of diagnosis (surgery, radiotherapy, chemotherapy, aromatase inhibitor, tamoxifen), and exposure to glucose-lowering drugs before breast cancer diagnosis (yes/no). |
| Xiao, 2013, China[31]      | 2002.1-2006.12              | Tianjin Medical University Cancer Institute and Hospital              | Incomplete medical records; multiple primary cancer; male; not receive surgery, chemotherapy, or endocrine therapy; not take hypoglycemic drugs                                                                                                                                                                              | 680/5785 (11.8%)                   | NA                | Age, BMI, cardiovascular and cerebrovascular complications, amenorrhea, pathologic stage, lymph node, vessel carcinoma embolus, chemotherapy and endocrine regimen                                                                                                                                                                                                                                            |
| Peeters, 2013, Denmark[24] | 1996-2008                   | National registers in Denmark                                         | Receiving biguanide agents other than metformin (i.e. phenformin, buformin)                                                                                                                                                                                                                                                  |                                    | NA                | Age, Charlson Comorbidity Index, number of years between Jan1, 1997 and the date of breast cancer diagnosis, use of concomitant medication during follow-up: metformin, sulfonylureas,                                                                                                                                                                                                                        |

|                             |                       |                                                      |                                                                                                                                                                                                           |                                              |                                                                                                                                                     |                                                                                                                              |
|-----------------------------|-----------------------|------------------------------------------------------|-----------------------------------------------------------------------------------------------------------------------------------------------------------------------------------------------------------|----------------------------------------------|-----------------------------------------------------------------------------------------------------------------------------------------------------|------------------------------------------------------------------------------------------------------------------------------|
|                             |                       |                                                      |                                                                                                                                                                                                           |                                              |                                                                                                                                                     | thiazolidinediones, other anti-diabetic drugs, hormone replacement therapy, and statins in the past 6 months                 |
| Zhu, 2013, China[25]        | 2006.1-2011.12        | Qilu Hospital of Shandong University                 | Male, bilateral breast cancer, DCIS, stage IV, failure to follow cancer practice guidelines, type 1 diabetes, secondary diabetes, impaired fasting glucose, but not constituting diagnosed with diabetes. |                                              | NA                                                                                                                                                  | Age, menopausal status, histological grade, lymph node metastasis status, ER, PR, HER2, TNM stage, chemotherapy, diabetes    |
| El-Benhawy, 2014, Egypt[28] | 2008.01.01-2008.12.31 | Medical Research Institute, University of Alexandria | Diagnosis of diabetes after starting of anticancer treatment, resolved gestational diabetes, second concurrent primary cancer, and administration of other anti-diabetic therapy for the metformin group  | 39/439 (8.9%)                                | Ranged from 500 to 2000 mg orally once a day with the evening meal (extended release tablets) or 500 mg twice daily. Maximum daily dose was 2500 mg | Age (<50 vs ≥50), ER and PR, lymph node metastasis status, tumor grade (III vs. II and I), clinical stage (III vs. II and I) |
| Xu, 2014, USA[29]           | 1995.01.01-2010.12.31 | Vanderbilt University Medical Center and Mayo Clinic | Congestive heart failure or chronic kidney disease prior to tumor diagnosis                                                                                                                               | Vanderbilt:9% of 32415<br>Mayo: 11% of 79258 | NA                                                                                                                                                  | Age, race, BMI, tobacco use, insulin, cancer type, and non-cancer Charlson index                                             |
| Oppong, 2014, USA[30]       | 2000.01.01-2005.12.31 | Memorial Sloan Kettering                             | Male, type I DM, gestational or steroid-induced diabetes, diagnosed with DM >6 months after breast cancer diagnosis                                                                                       | -                                            | NA                                                                                                                                                  | Age, stage, hormone receptor                                                                                                 |

Abbreviations: BMI, body mass index; DM, diabetes mellitus; ICD-9, International Classification of Diseases, 9th revision; ICD-O, International Classification of Diseases for Oncology; LVI, lymphovascular invasion; NA, not available.

**eTable 3.** Study quality assessment

| Reference                   | Population source       |                     | Diabetes ascertainment           |                    | Metformin ascertainment |               |              | Outcome ascertainment |                |                          | Metformin evaluated as |                  | Statistical analysis adjusted model |
|-----------------------------|-------------------------|---------------------|----------------------------------|--------------------|-------------------------|---------------|--------------|-----------------------|----------------|--------------------------|------------------------|------------------|-------------------------------------|
|                             | Population-based cohort | Clinic-based cohort | Medical record or medication use | Laboratory results | Medical record          | Questionnaire | Not reported | Registry              | Medical record | Telephone/mail follow-up | Not reported           | Primary exposure |                                     |
| Bayraktar, 2012, USA[21]    |                         | ■                   | ■                                |                    | ■                       |               |              |                       |                |                          | ■                      |                  | ■                                   |
| He, 2012, USA[22]           |                         | ■                   | ■                                |                    | ■                       |               |              | ■                     | ■              | ■                        |                        |                  | ■                                   |
| Zhao, 2012, China[26]       |                         | ■                   | ■                                |                    | ■                       |               |              |                       | ■              | ■                        |                        |                  | ■                                   |
| Cleveland, 2012, USA[27]    |                         | ■                   | ■                                |                    |                         | ■             |              | ■                     |                |                          |                        | ■                | ■                                   |
| Lega, 2013, Canada[23]      | ■                       |                     | ■                                |                    | ■                       |               |              | ■                     |                |                          |                        | ■                | ■                                   |
| Xiao, 2013, China[31]       |                         | ■                   | ■                                | ■                  |                         |               | ■            | ■                     | ■              | ■                        |                        |                  | ■                                   |
| Peeters, 2013, Denmark[24]  | ■                       |                     | ■                                |                    | ■                       |               |              | ■                     |                |                          |                        | ■                | ■                                   |
| Zhu, 2013, China[25]        |                         | ■                   | ■                                |                    | ■                       |               |              |                       | ■              | ■                        |                        |                  | ■                                   |
| El-Benhawy, 2014, Egypt[28] |                         | ■                   | ■                                |                    | ■                       |               |              |                       |                |                          | ■                      |                  | ■                                   |
| Xu, 2014, USA[29]           |                         | ■                   | ■                                | ■                  | ■                       |               |              | ■                     |                |                          |                        |                  | ■                                   |
| Oppong, 2014, USA[30]       |                         | ■                   | ■                                |                    | ■                       |               |              |                       |                |                          | ■                      |                  | ■                                   |

■ Present in study.

Egger's publication bias plot

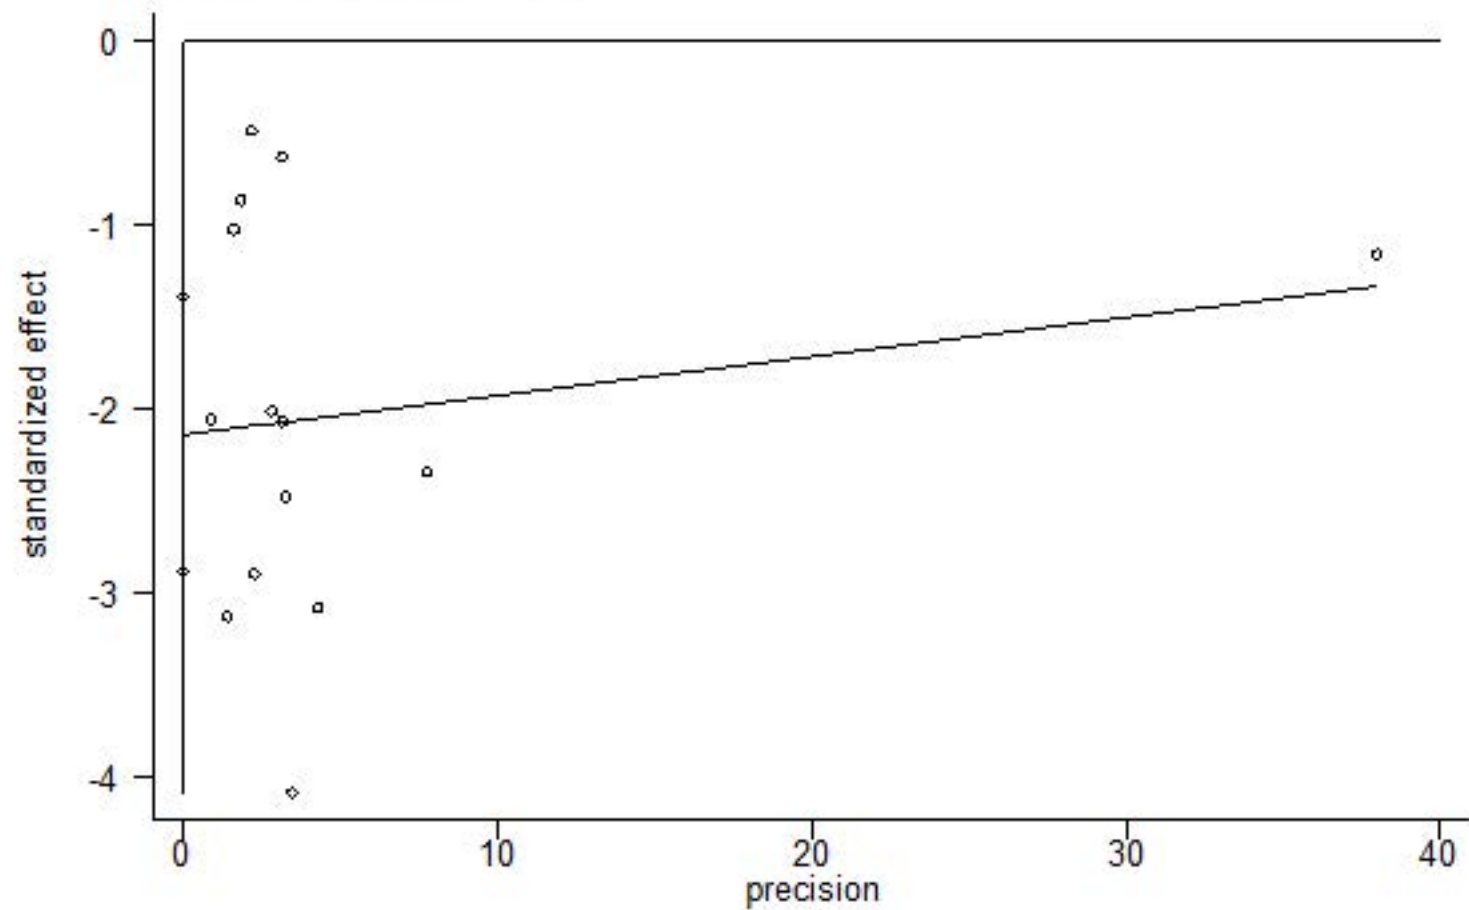

Begg's funnel plot with pseudo 95% confidence limits

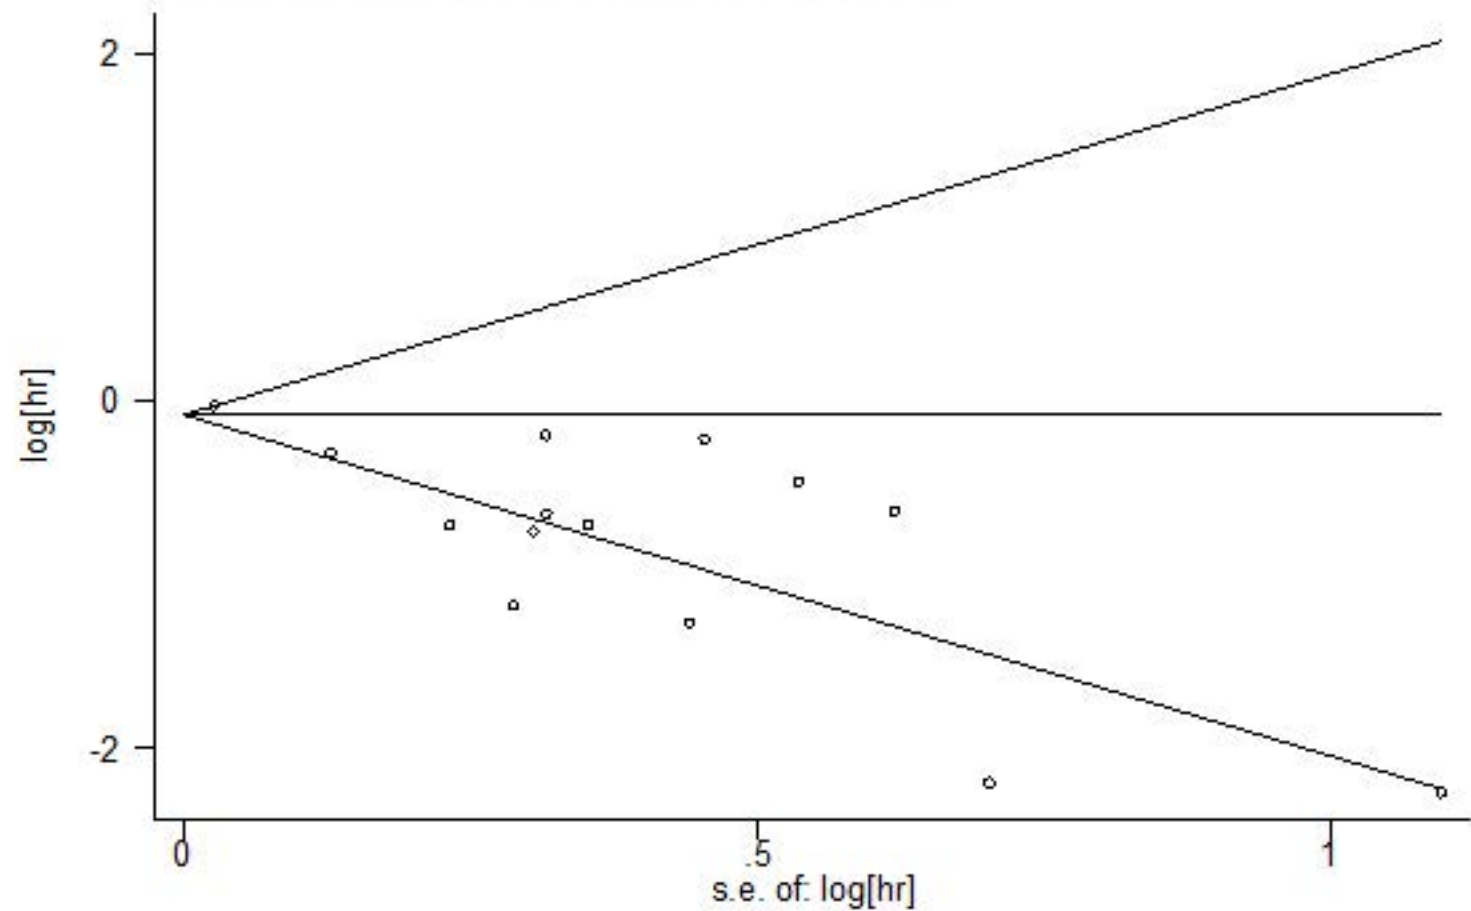



Filled funnel plot with pseudo 95% confidence limits

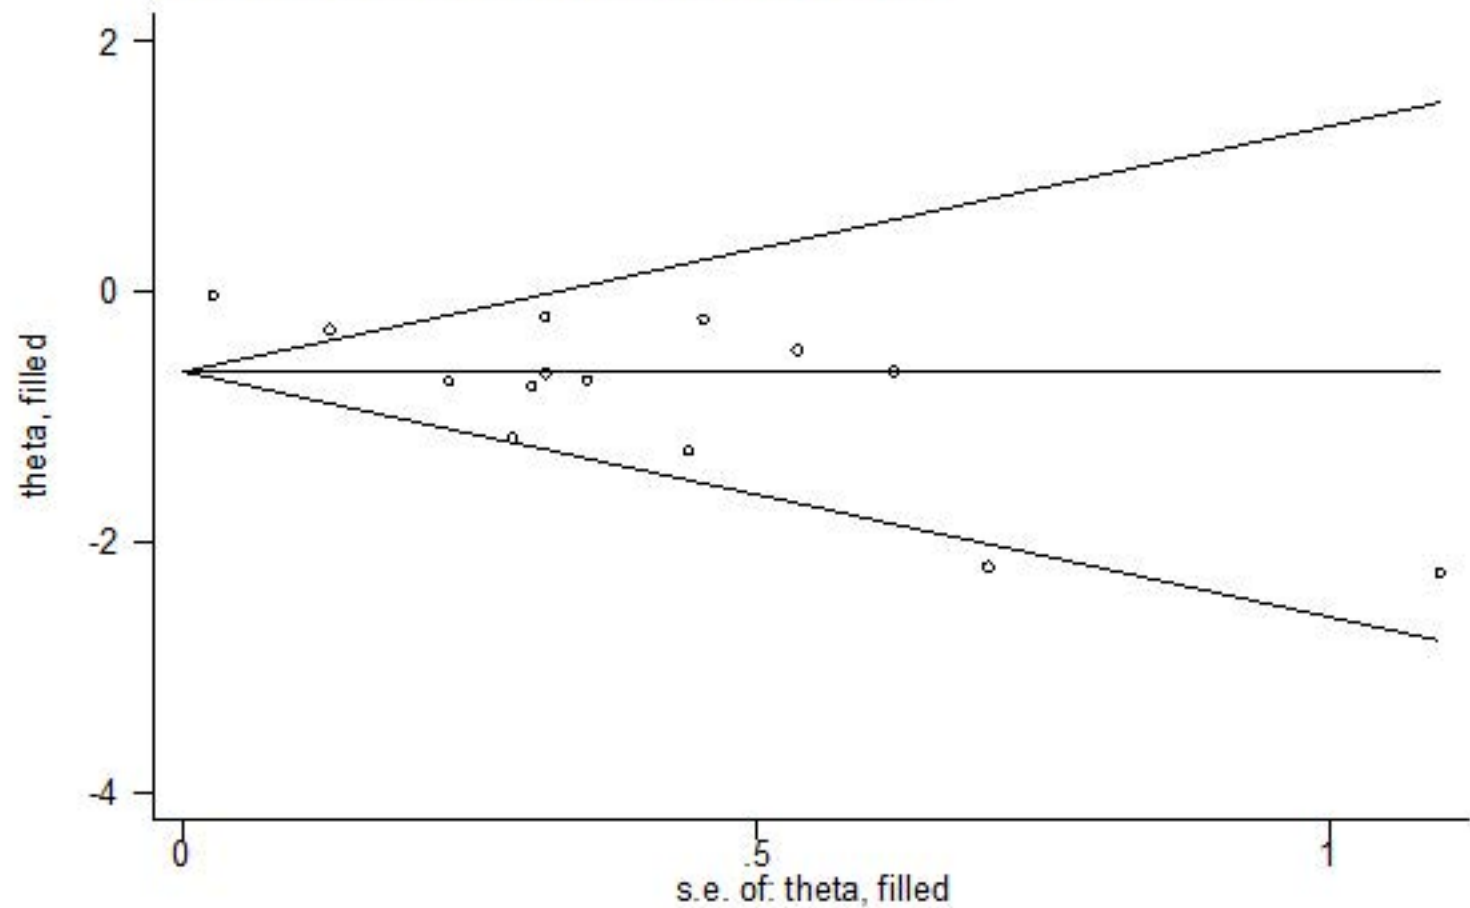

Study

HR (95% CI)

Weight %

He et al, 2012

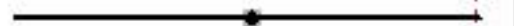

0.47 (0.24, 0.90)

2.93

Peeters et al, 2013

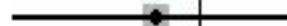

0.88 (0.59, 1.29)

8.37

Lega et al, 2013

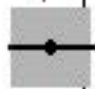

0.91 (0.81, 1.03)

88.70

Overall (I-squared = 46.2%, p = 0.158)

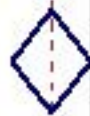

0.89 (0.79, 1.00)

100.00

Favors metformin

.5

1

1.5

3

Favors nonmetformin

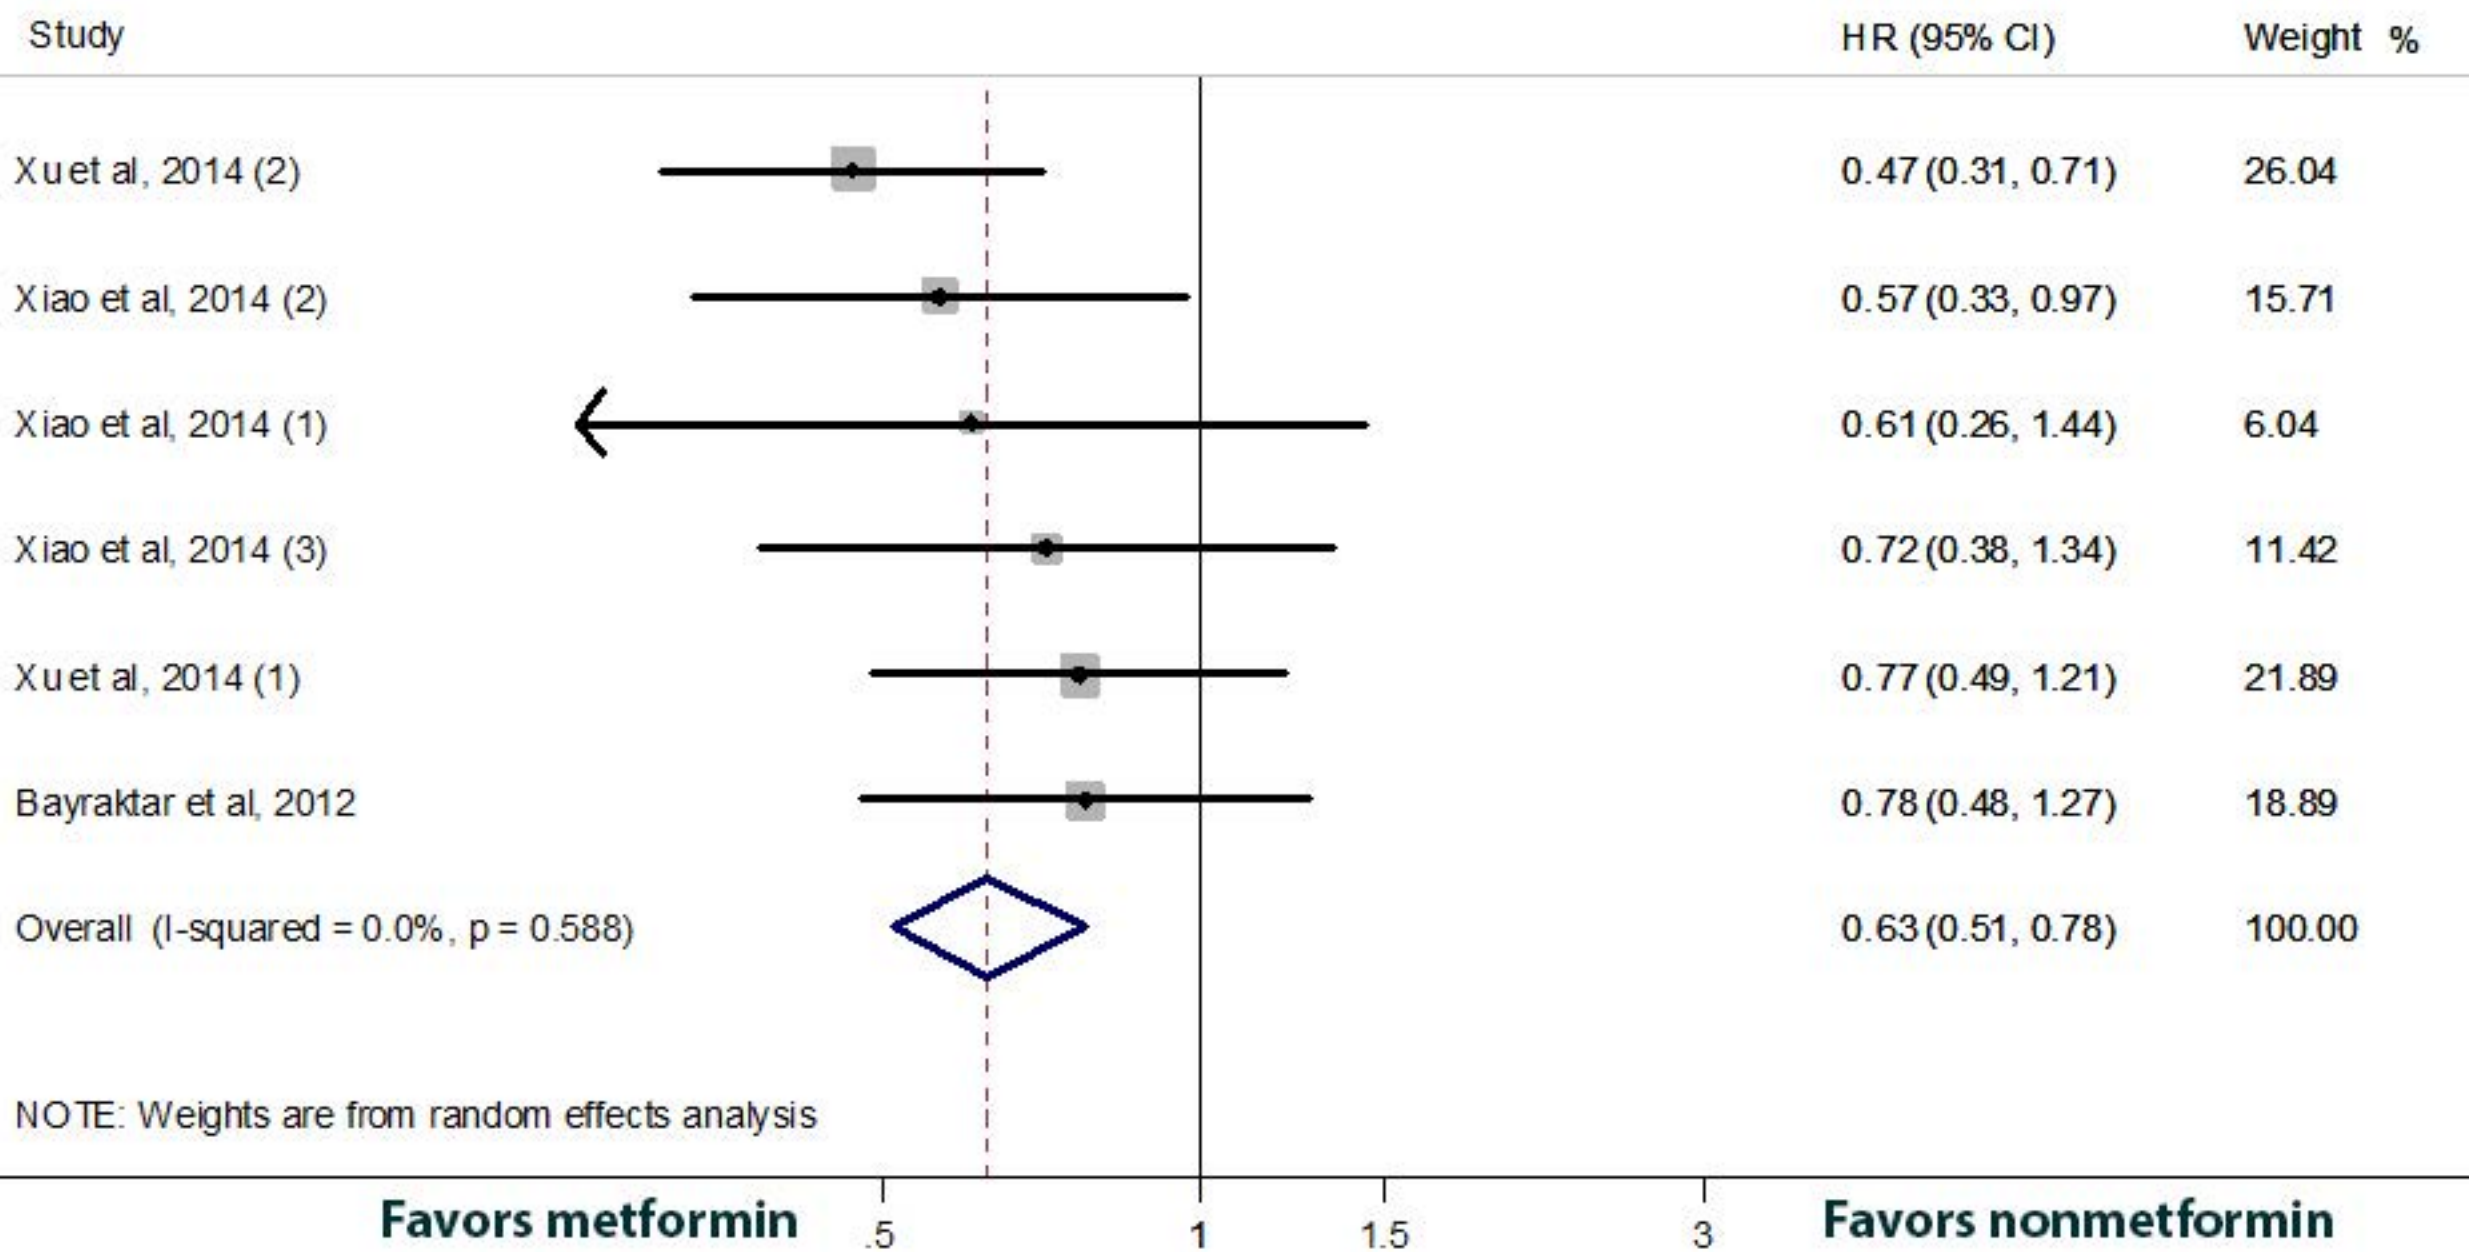

Supplement: supp_the2015-0096_Supplemental_Material.pdf [file supp_the2015-0096_Supplemental_Material.pdf]
